# Supplementary figures and images for: Adverse Responses following Exposure to Subtoxic Concentrations of Zinc Oxide and Nickle Oxide Nanoparticles in the Raw 264.7 Cells
Source: MDPI journal article supplement (doi:10.3390/toxics11080674), 2023-08-06

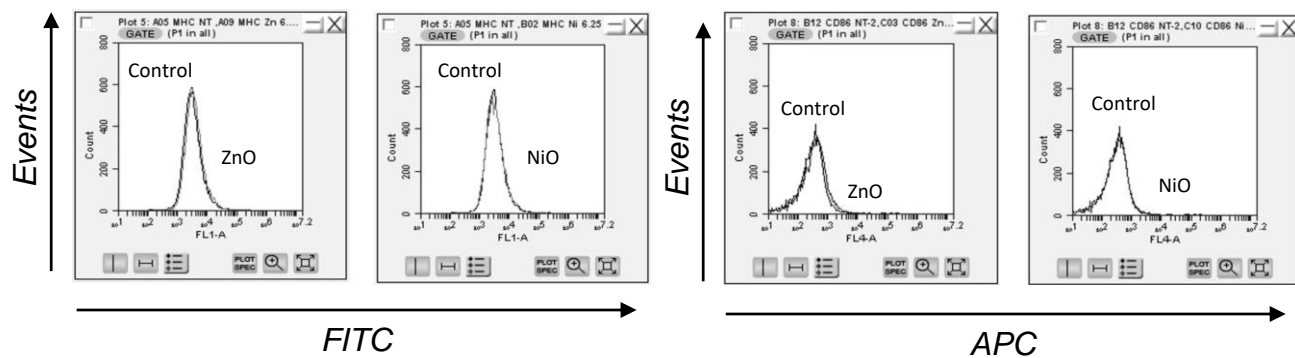

Figure S1

Supplement: s1 [file s1]
